# Supplementary material for: The regional temperature implications of strong air quality measures
Source: Copernicus journal article supplement (doi:10.5194/acp-2019-603), 2019-07-23
Supplement: Supplementary file 1 [file acp-2019-603-supplement.pdf]

1 **1 Uncertainty analysis**

2

3 Table 1: Relative uncertainties in the radiative forcing applied in the Monte Carlo analysis.

| Species | Relative uncertainty (1 SD) | Source               |
|---------|-----------------------------|----------------------|
| BC      | 39 %                        | Myhre et al. (2013a) |
| OC      | 33 %                        | Myhre et al. (2013a) |
| SO2     | 34 %                        | Myhre et al. (2013a) |
| NOx     | 73 %                        | Myhre et al. (2013b) |
| CO      | 15 %                        | Myhre et al. (2013b) |
| VOC     | 25 %                        | Myhre et al. (2013b) |
| CH4     | 10 %                        | Myhre et al. (2013b) |

4

5 **2 Additional figures with other perspectives**

6 Due to masked warming of historical emissions of SLCFs, we are likely overestimating the temperature  
7 reduction potential by reducing emissions of warming SLCFs. In SLCP, we are overestimating the  
8 temperature reduction potential by approximately

9 Due to space constraints, the article investigate only some different parameters. As different users may  
10 have different interests, we present some additional figures here. The emission perturbations in  
11 emission regions Europe, East Asia, rest of the World (ROW), and global shipping for the SLCP and MTRF  
12 scenarios compared to the baseline CLE are shown in Figs. S1 and S2, respectively. The total warming  
13 and total cooling for SLCP and MTRF relative to CLE are shown in Fig. S3. Figures S4 and S5 show the  
14 global temperature response for emission mitigation according to the SLCP and MTRF scenario,  
15 respectively, in emission regions Europe, East Asia, rest of the World (ROW), and global shipping. In Fig.  
16 S6, we separate ROW into a subset of regions. As ARTP values are not available for these regions, the  
17 ARTP value for ROW is applied for all regions. This is a simplification, but gives an indication of what  
18 regions can contribute the most in reducing the global and regional temperatures. The remaining figures  
19 show the regional and global temperature response in 2035, 2070, and 2100. Figures S7 and S8 present  
20 the temperature perturbation for emission regions and emission sectors for SLCP and MTRF scenarios,  
21 respectively. Figures S9 and S10 give the temperature perturbation for emission sectors and species for  
22 SLCP and MTRF scenarios, respectively.

23

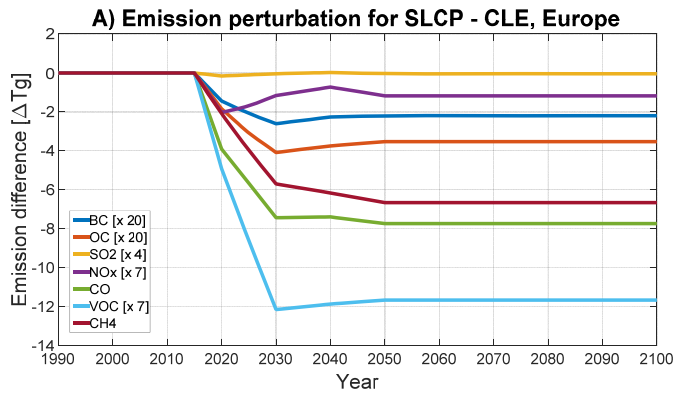

24

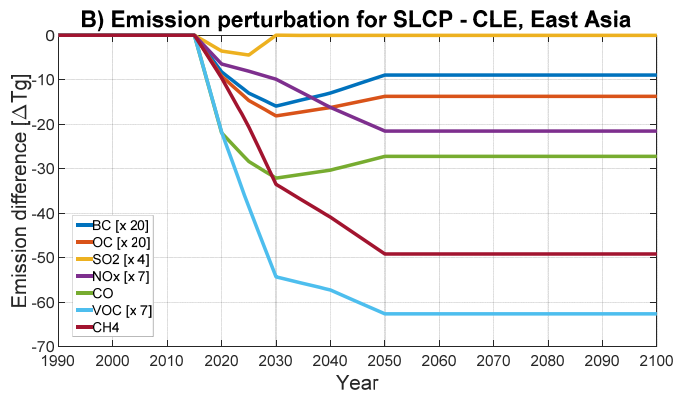

25

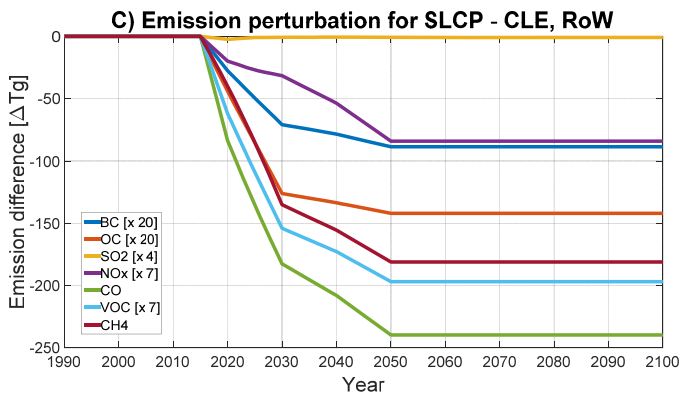

26

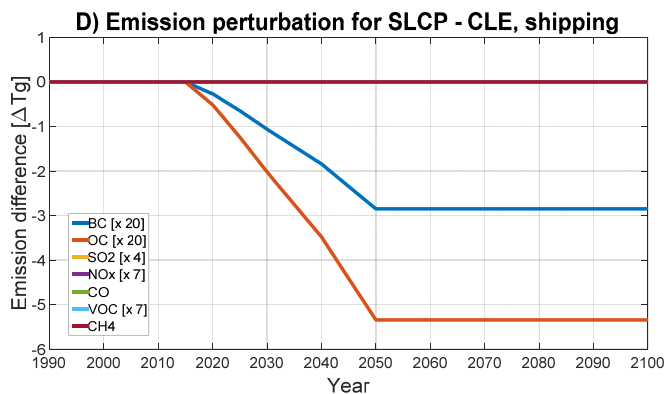

27

28 Figure S1: The emission difference between SLCP and CLE for different emission regions. Note the  
 29 different scales.

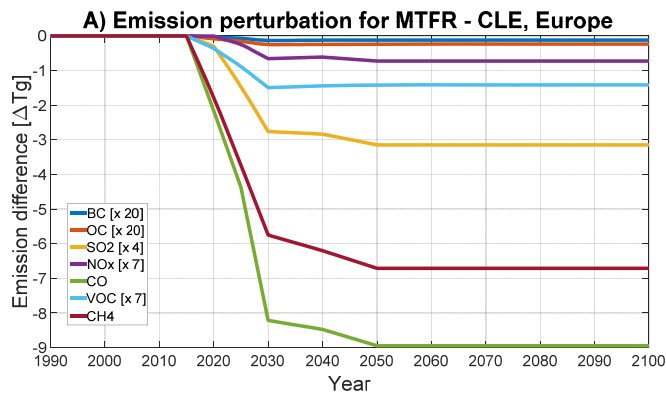

30

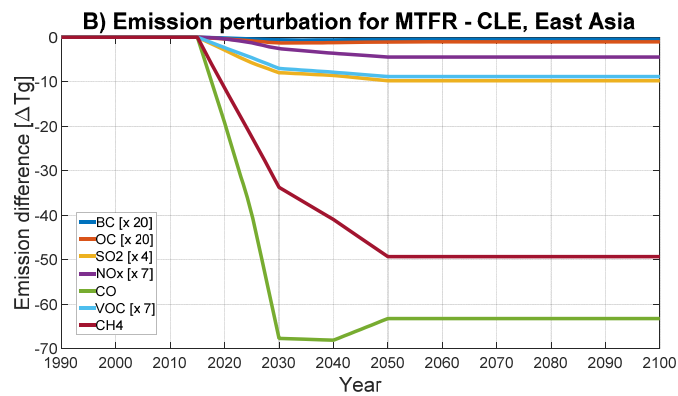

31

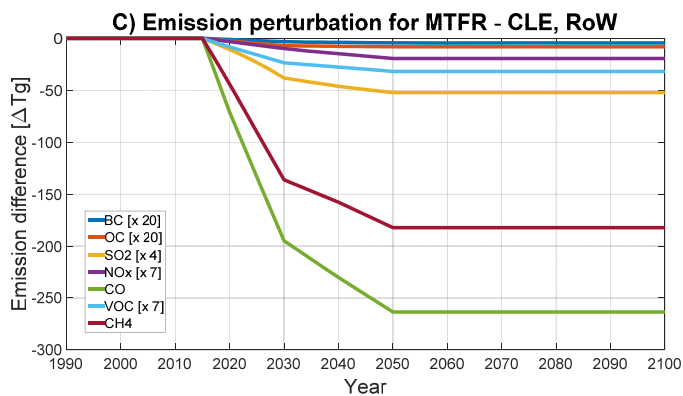

32

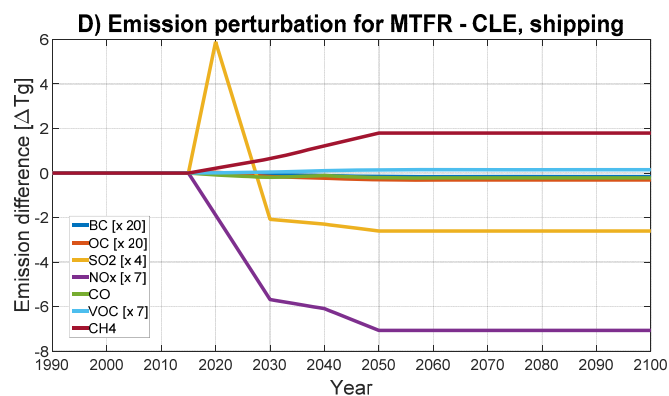

33

34 Figure S2: The emission difference between MTFR and CLE for different emission regions. Note the  
 35 different scales.

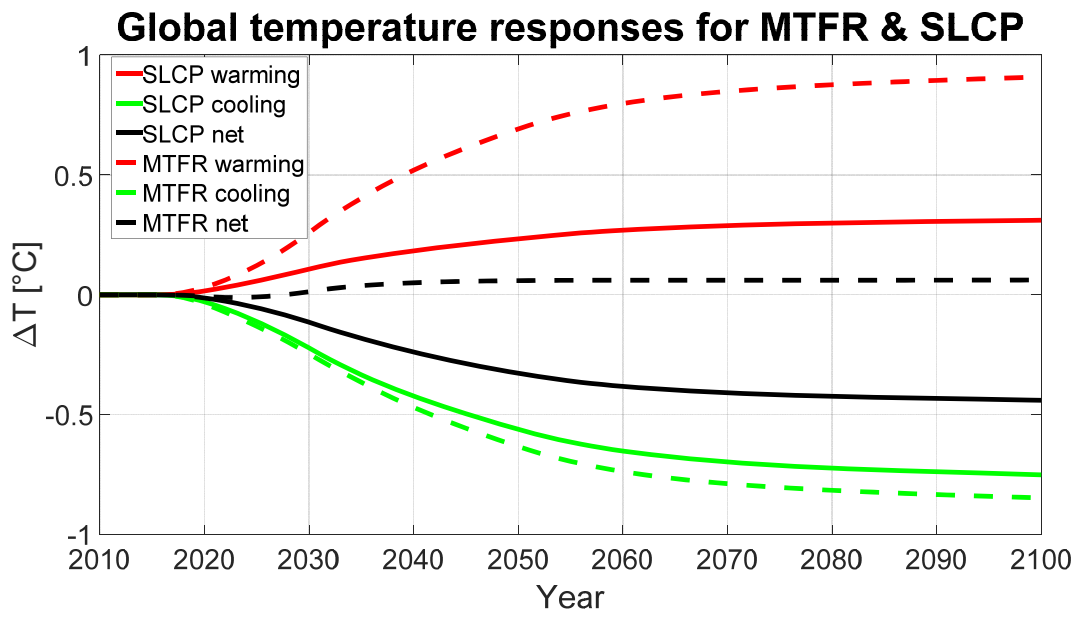

36

37 Figure S3: The global temperature response in SLCP and MTFR relative to CLE. The warming and  
 38 cooling components have been separated.

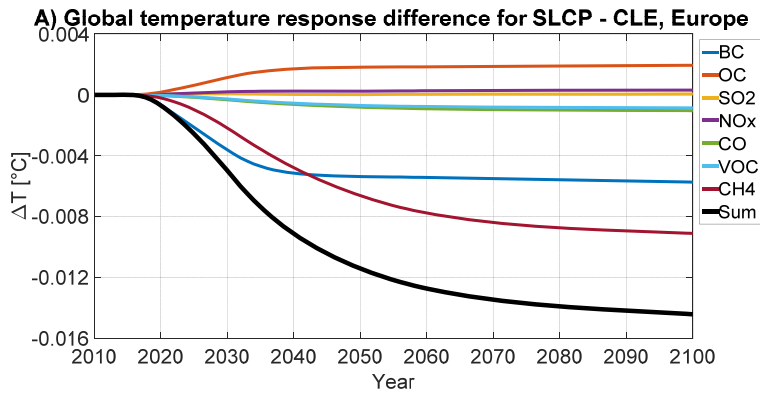

39

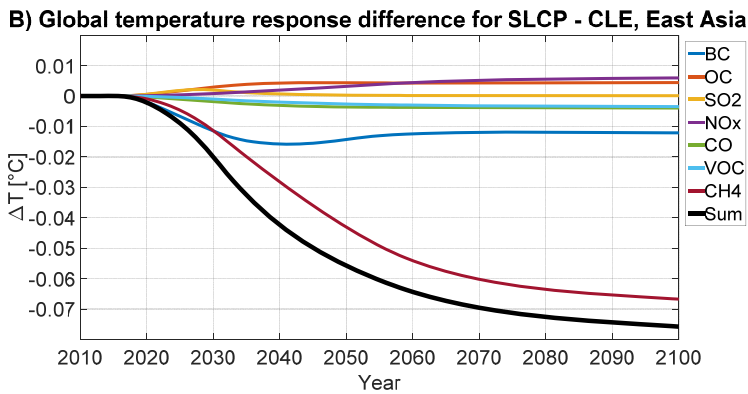

40

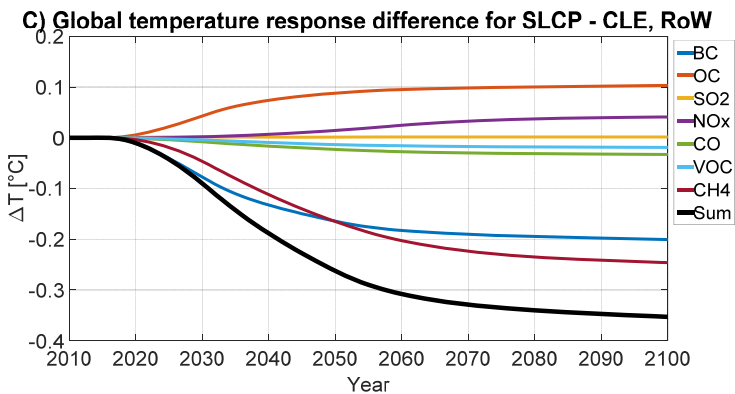

41

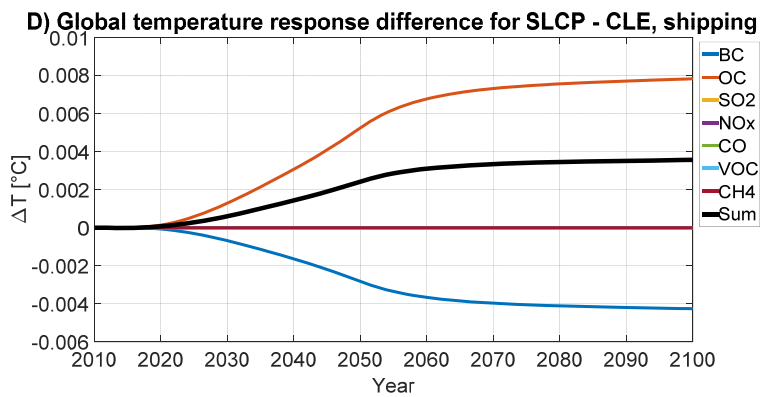

42

43 Figure S4: The global temperature response due to mitigation of SLCFs in different emission regions  
 44 relative to baseline CLE. Note the different scales for the SLCP mitigation scenario.

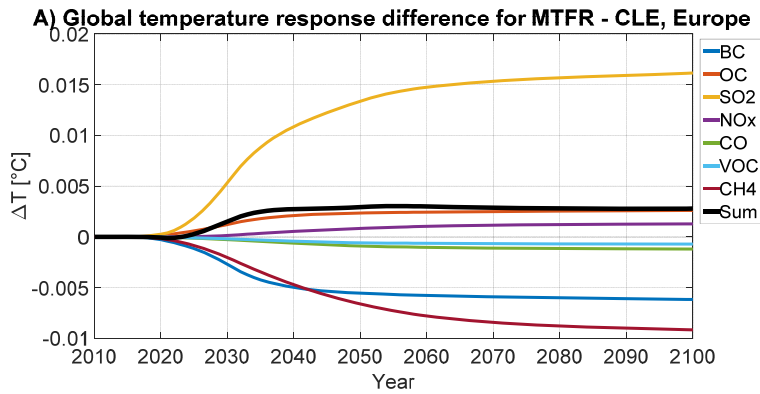

45

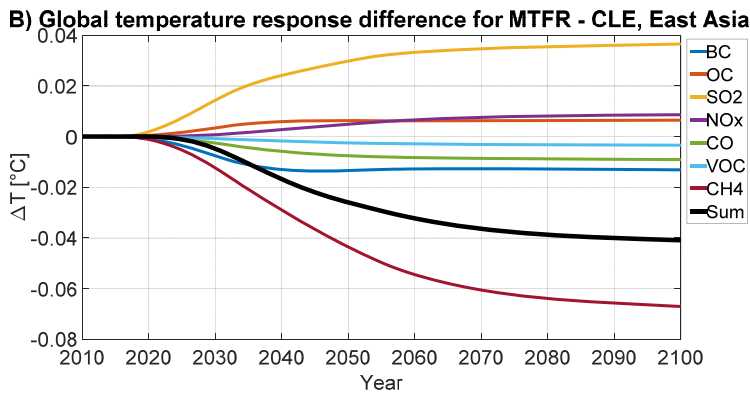

46

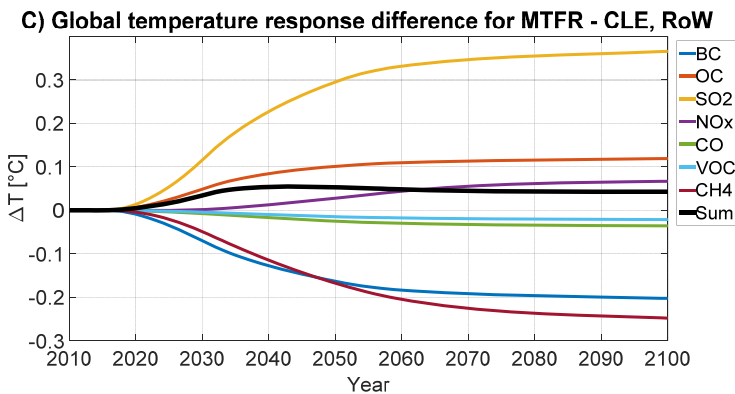

47

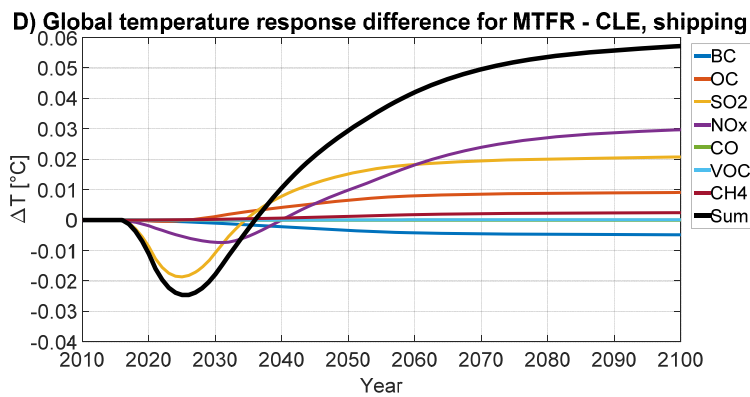

48

49 Figure S5: The global temperature response due to mitigation of SLCFs in different emission regions  
 50 relative to baseline CLE. Note the different scales for the MTFR mitigation scenario.

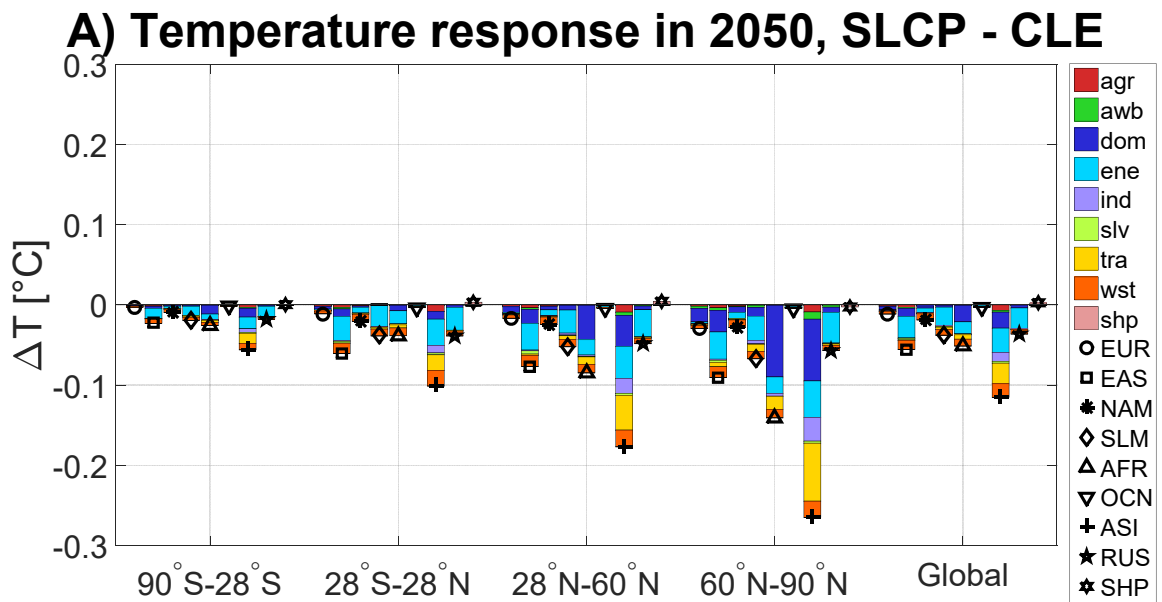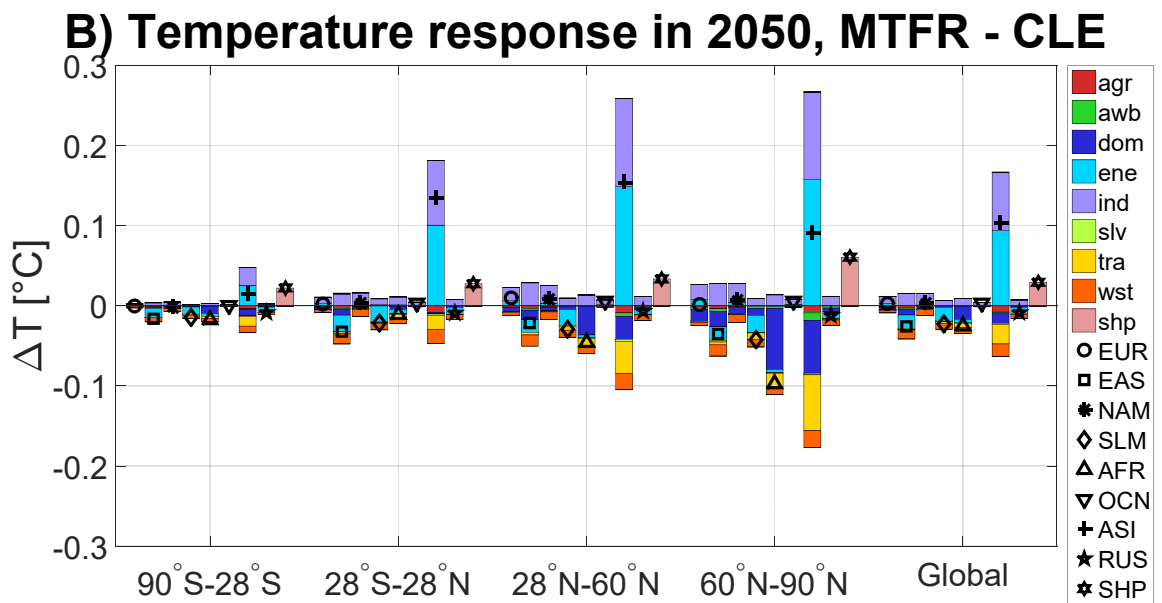

53 Figure S6: The temperature response in the latitude bands and globally in 2050 for emission regions and  
 54 emission sectors for SLCP (A) and MTR scenario (B) relative to baseline CLE. The regions are Europe  
 55 (EUR), East Asia (EAS), North America (NAM), South and Latin America (SLM), Africa (AFR),  
 56 Australia and Oceania (OCN), rest of Asia (ASI), Russia and other (RUS), and global shipping (SHP).

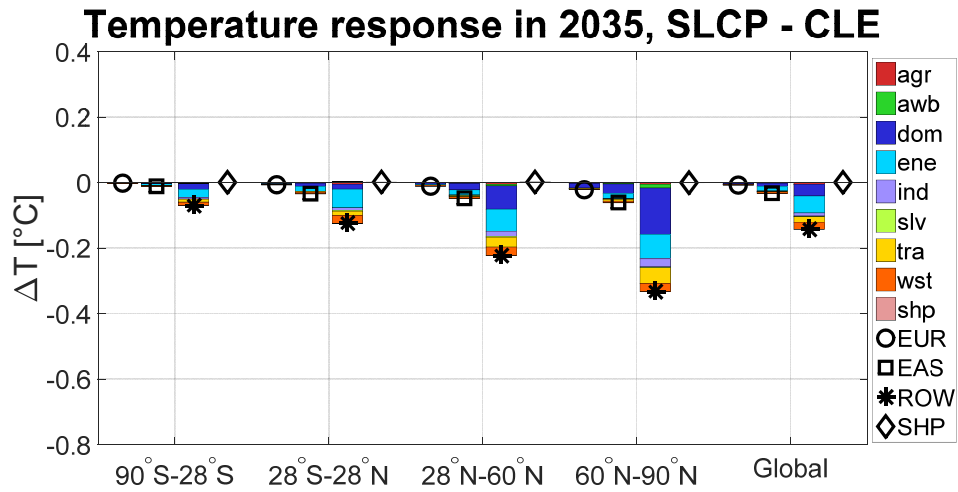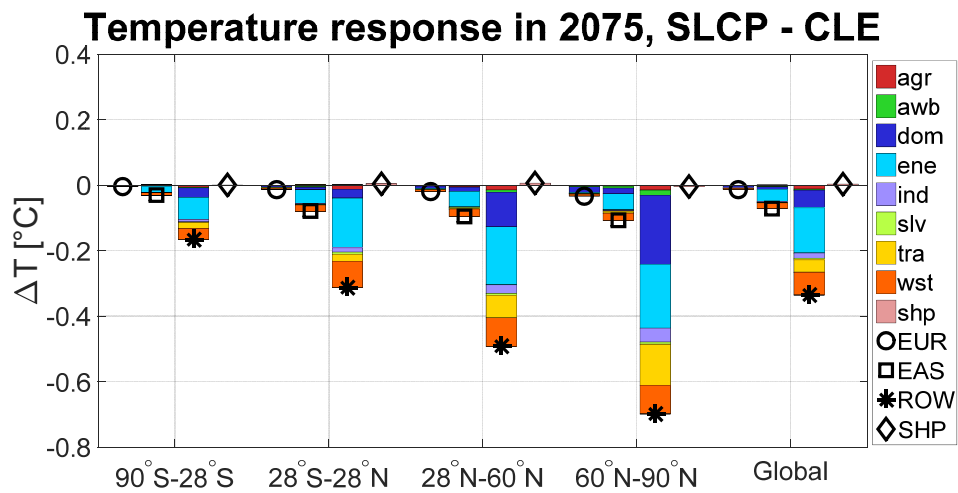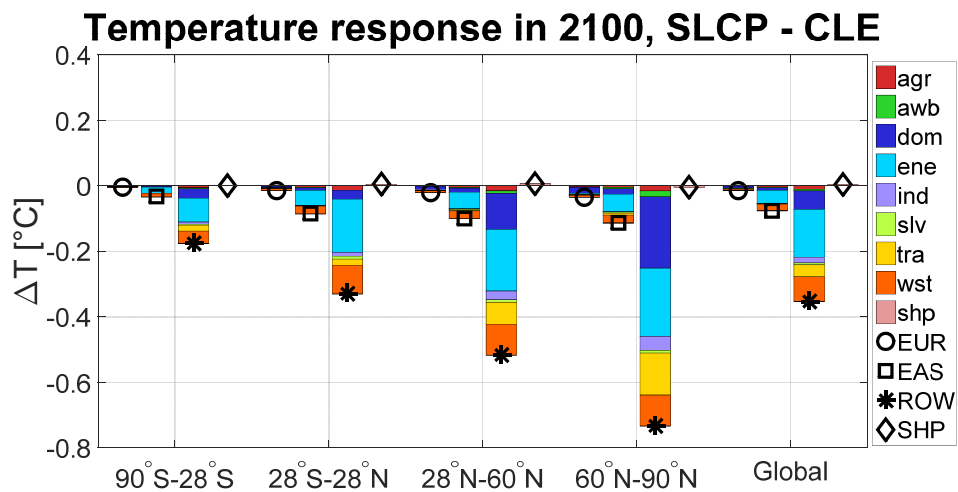

60 Figure S7: The regional temperature response from the SLCP mitigation scenario relative to baseline CLE  
 61 for emission regions and emission sectors in 2035, 2075, and 2100.



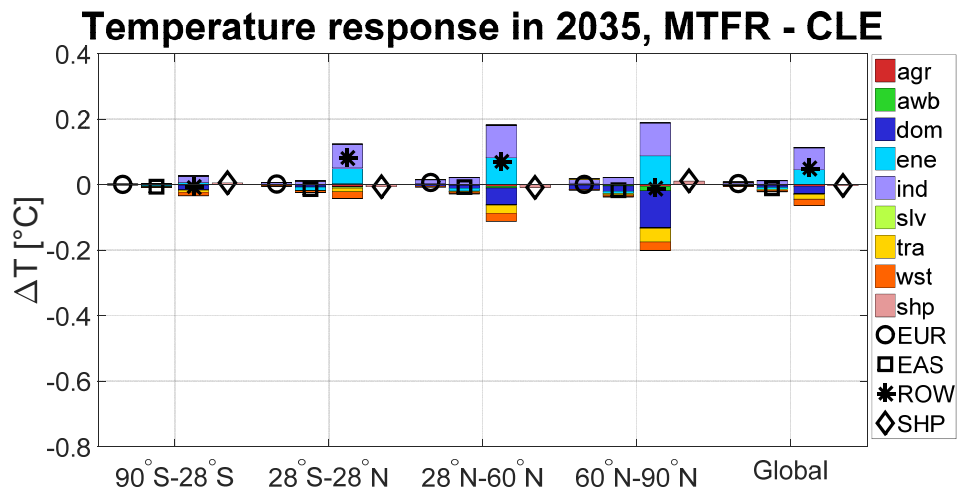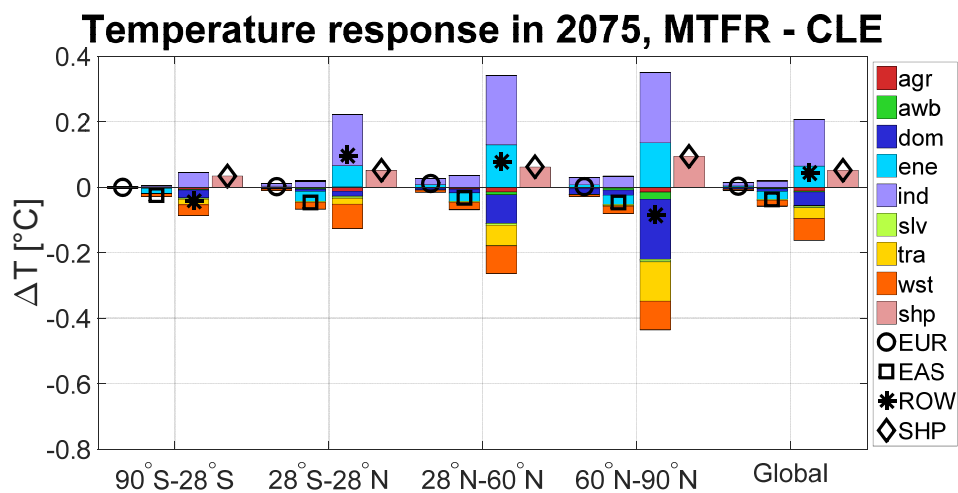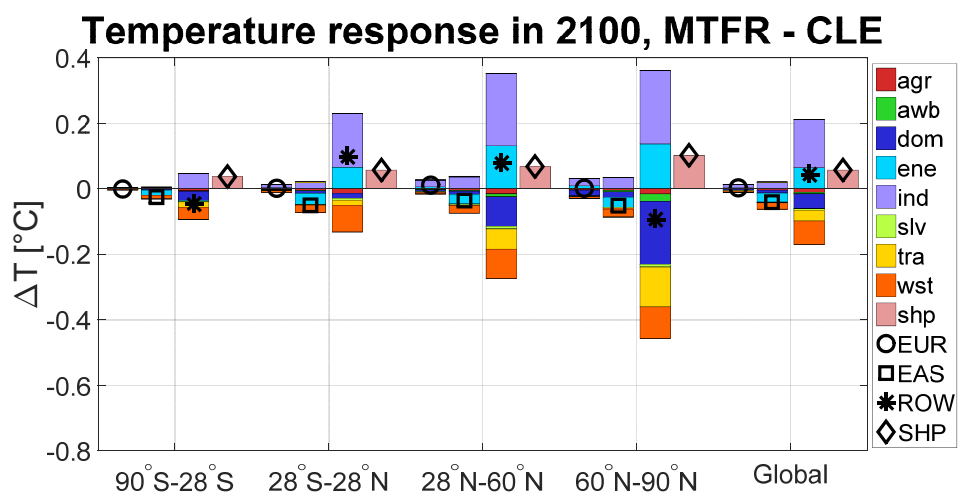

66 Figure S8: The regional temperature response from the MTFR mitigation scenario relative to baseline  
 67 CLE for emission regions and emission sectors in 2035, 2075, and 2100.

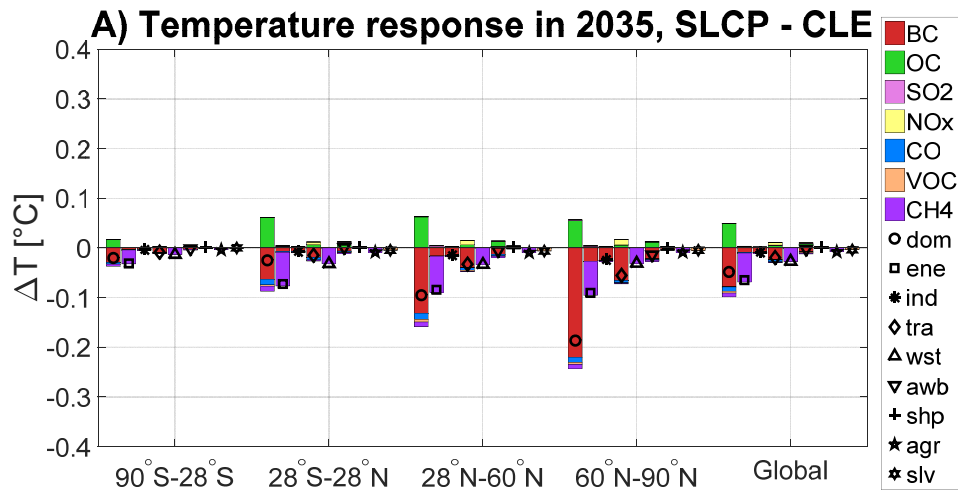

68

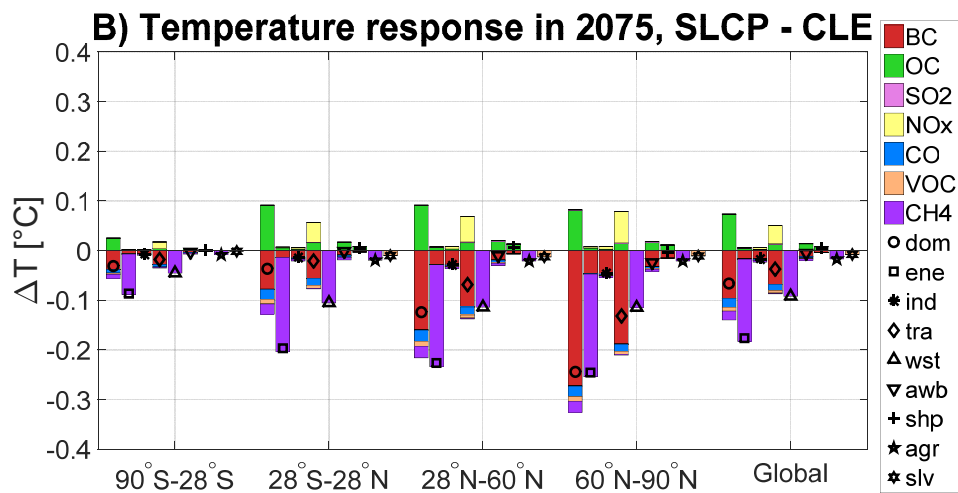

69

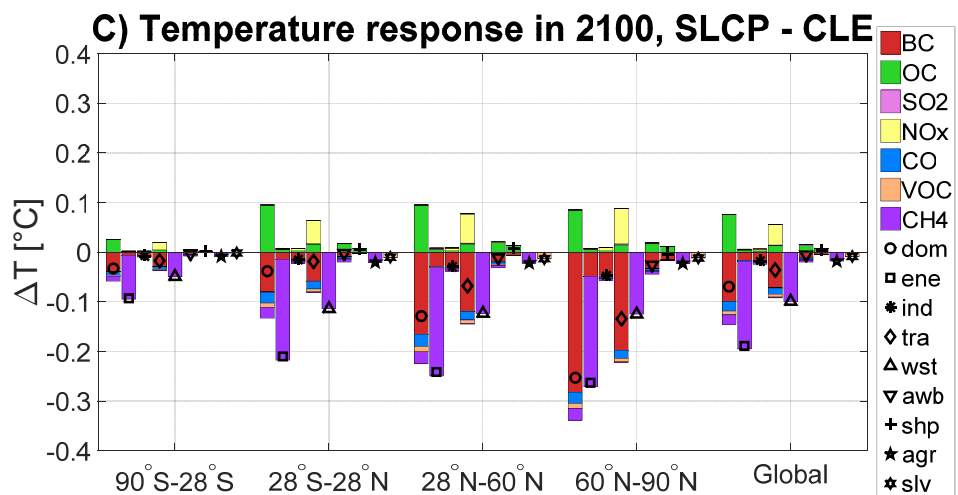

70

71 Figure S9: The regional temperature response from the SLCP mitigation scenario relative to baseline CLE  
 72 for emission sectors and species in 2035, 2075, and 2100.

73

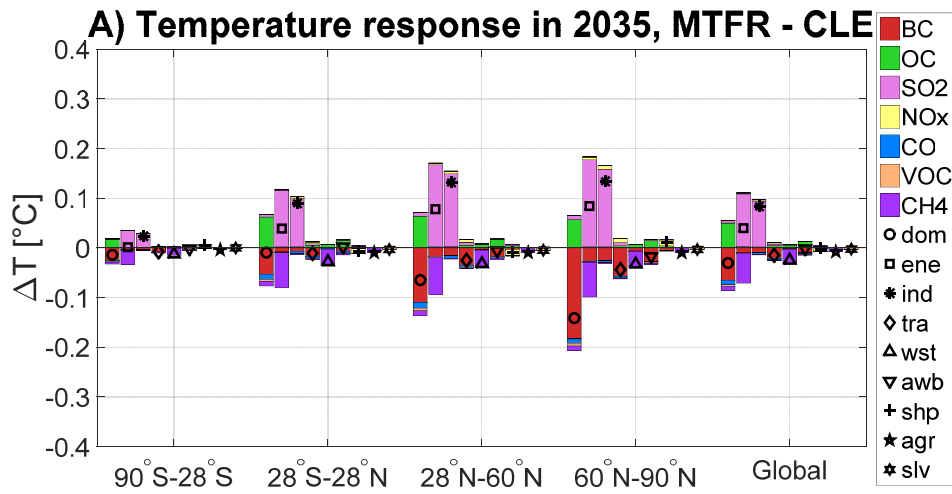

74

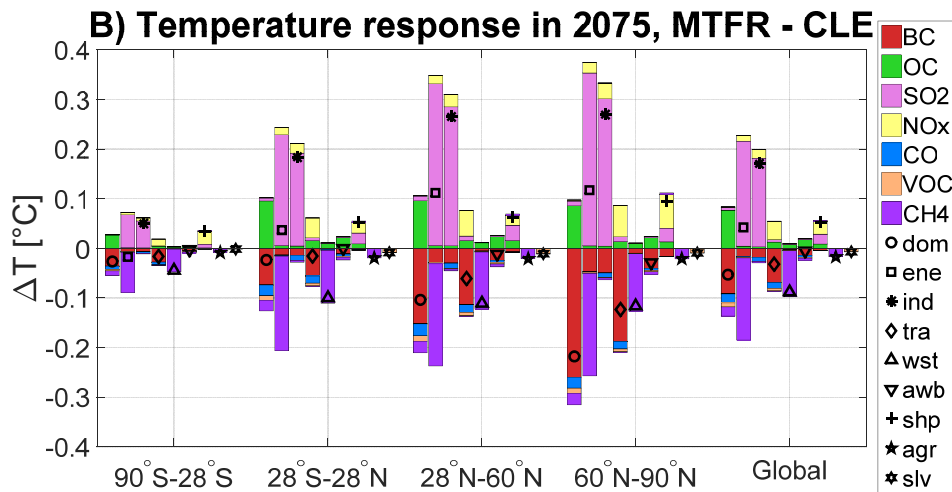

75

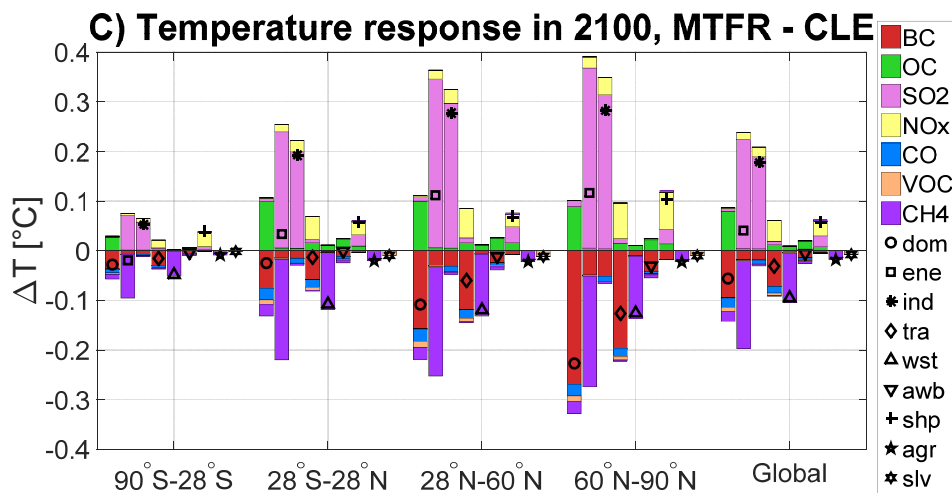

76

77 Figure S10: The regional temperature response from the MTFR mitigation scenario relative to baseline  
 78 CLE for emission sectors and species in 2035, 2075, and 2100.

79 **References**

80 Myhre, G., Samset, B. H., Schulz, M., Balkanski, Y., Bauer, S., Berntsen, T. K., Bian, H., Bellouin, N., Chin,  
81 M., Diehl, T., Easter, R. C., Feichter, J., Ghan, S. J., Hauglustaine, D., Iversen, T., Kinne, S., Kirkevåg, A.,  
82 Lamarque, J. F., Lin, G., Liu, X., Lund, M. T., Luo, G., Ma, X., van Noije, T., Penner, J. E., Rasch, P. J., Ruiz,  
83 A., Seland, Ø., Skeie, R. B., Stier, P., Takemura, T., Tsigaridis, K., Wang, P., Wang, Z., Xu, L., Yu, H., Yu, F.,  
84 Yoon, J. H., Zhang, K., Zhang, H., and Zhou, C.: Radiative forcing of the direct aerosol effect from  
85 AeroCom Phase II simulations, *Atmos. Chem. Phys.*, 13, 1853-1877, 10.5194/acp-13-1853-2013, 2013a.  
86 Myhre, G., Shindell, D., Bréon, F.-M., Collins, B., Fuglestvedt, J. S., Huang, J., Koch, D., Lamarque, J.-F.,  
87 Lee, D., Mendoza, B., Nakajima, T., Robock, A., Stephens, G., Takemura, T., and Zhang, H.: Anthropogenic  
88 and Natural Radiative Forcing, in: *Climate Change 2013: The Physical Science Basis. Contribution of*  
89 *Working Group I to the Fifth Assessment Report of the Intergovernmental Panel on Climate Change,*  
90 *edited by: Stocker, T. F., Qin, D., Plattner, G. K., Tignor, M., Allen, S. K., Boschung, J., Nauels, A., Xia, Y.,*  
91 *Bex, V., and Midgley, P. M., Cambridge University Press, Cambridge, United Kingdom and New York, NY,*  
92 *USA, 2013b.*

93
